# Supplementary material for: Prevention of child mental health problems in Southeastern Europe: a multicentre sequential study to adapt, optimise and test the parenting programme ‘Parenting for Lifelong Health for Young Children’, protocol for stage 1, the feasibility study
Source: PubMed Central journal article supplement — BMJ Open. 2019 Jan 25;9(1):e026684. doi: 10.1136/bmjopen-2018-026684 (PMC6352775; doi:10.1136/bmjopen-2018-026684), 2019-01-25
Supplement: bmjopen-2018-026684.reviewer_comments.pdf [file bmjopen-2018-026684.reviewer_comments.pdf]

## PEER REVIEW HISTORY

BMJ Open publishes all reviews undertaken for accepted manuscripts. Reviewers are asked to complete a checklist review form (<http://bmjopen.bmj.com/site/about/resources/checklist.pdf>) and are provided with free text boxes to elaborate on their assessment. These free text comments are reproduced below.

## ARTICLE DETAILS

|                            |                                                                                                                                                                                                                                                          |
|----------------------------|----------------------------------------------------------------------------------------------------------------------------------------------------------------------------------------------------------------------------------------------------------|
| <b>TITLE (PROVISIONAL)</b> | Prevention of Child Mental Health Problems in South-eastern Europe: A Multi-centre Sequential Study to Adapt, Optimise and Test the Parenting Programme "Parenting for Lifelong Health for Young Children" - Protocol for Stage 1, the Feasibility Study |
| <b>AUTHORS</b>             | Frantz, Inga; Foran, Heather; Lachman, Jamie; Jansen, Elena; Hutchings, Judy; Băban, Adriana; Fang, Xiangming; Gardner, Frances; Lesco, Galina; Raleva, Marija; Ward, Catherine; Williams, Margiad; Heinrichs, Nina                                      |

This article was not externally reviewed at BMJ Open. Protocols that have been independently assessed prior to submission to BMJ Open are usually fast-tracked to publication on the grounds that further substantial changes will not be possible. This independent assessment will usually be external, independent review for both a substantial grant award from a non-commercial or government funder and ethics approval.
